# Supplementary material for: A comprehensive assessment of the SOD1G93A low-copy transgenic mouse, which models human amyotrophic lateral sclerosis
Source: PubMed Central journal article supplement — Dis Model Mech. 2011 May 2;4(5):686–700. doi: 10.1242/dmm.007237 (PMC3180233; doi:10.1242/dmm.007237), 2011-05-02

**Figure S1. Acoustic startle response of  $SOD1^{G93A}$  high copy and wildtype littermate male mice.**

Littermates were used for analysis at both time points: 95 days: 7 wildtype and 8  $SOD1^{G93A}$  littermates (ANOVA  $P=0.023$ ); endstage (over 120 days): 4 wildtype and 6  $SOD1^{G93A}$  littermates (ANOVA  $P=0.016$ ). Bars represent the mean average startle-response per genotype. Error bars represent standard deviation of the mean.

## ***SOD1<sup>G93A</sup>* high-copy startle-response**

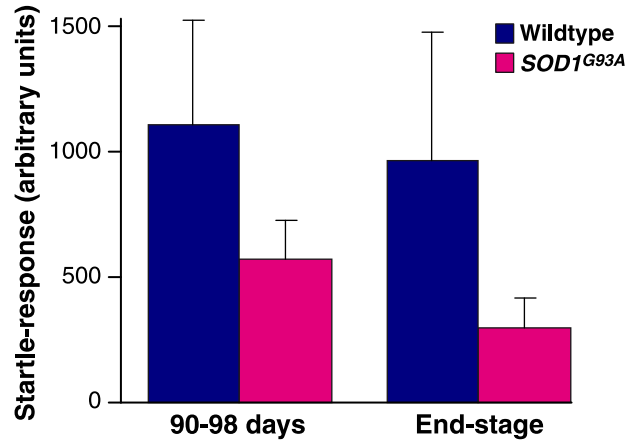

Supplement: supp_007237_DMM007237FigS1.pdf [file supp_007237_DMM007237FigS1.pdf]
