# Supplementary material for: A comprehensive assessment of the SOD1G93A low-copy transgenic mouse, which models human amyotrophic lateral sclerosis
Source: PubMed Central journal article supplement — Dis Model Mech. 2011 May 2;4(5):686–700. doi: 10.1242/dmm.007237 (PMC3180233; doi:10.1242/dmm.007237), 2011-05-02
Supplement: supp_007237_DMM007237TableS1-S2.pdf [file supp_007237_DMM007237TableS1-S2.pdf]

**Table S1. Effects of genetic background on disease onset and time to end-stage disease in *SOD1<sup>G93Adl</sup>* mice separated by sex.**

| Genetic background      | Sample size |    | Mild tremors |      | Moderate tremors |      | Limb-tone |      | Grip-strength |      | Startle response |      | Time to endpoint (weeks) |      |
|-------------------------|-------------|----|--------------|------|------------------|------|-----------|------|---------------|------|------------------|------|--------------------------|------|
|                         | ♀           | ♂  | ♀            | ♂    | ♀                | ♂    | ♀         | ♂    | ♀             | ♂    | ♀                | ♂    | ♀                        | ♂    |
| C57BL/6J                | 11          | 15 | 19.0         | 17.5 | 31.3             | 26.5 | 30.4      | 28.7 | 30.2          | 32.7 | 21.7             | 20.1 | 37.5                     | 38.1 |
| BALB/c                  | 3           | 3  | 14.7         | 14.0 | 29.7             | 27.0 | 27.0      | 27.0 | 31.7          | 29.0 | 19.7             | 16.0 | 34.1                     | 28.4 |
| C3H                     | 4           | 2  | 15.0         | 14.0 | 29.3             | 30.0 | 25.5      | 25.0 | 29.5          | 29.0 | 31.0             | 30.0 | 33.5                     | 30.4 |
| FVB                     | 5           | 3  | 12.8         | 12.0 | 24.0             | 22.0 | 20.0      | 21.3 | 29.0          | 24.7 | 30.0             | 25.0 | 29.7                     | 28.1 |
| B6-BALB/c               | 9           | 6  | 15.6         | 19.5 | 25.7             | 28.5 | 36.1      | 32.2 | 36.3          | 33.0 | 19.4             | 21.5 | 37.6                     | 32.6 |
| B6 wildtype littermates | 10          | 9  | 28.0         | 28.0 | -                | -    | -         | 32.0 | -             | -    | 27.3             | 27.3 | -                        | -    |

All values are the mean average age-at-onset per phenotype (weeks). Because of the low numbers per sex analysed for BALB/c, C3H and FVB strains we only attempted to detect phenotypic sex bias on the B6 and B6-BALB/c strains. Significant effects of gender on the B6 background only for time to onset of moderate tremors ( $P<0.001$ ). For the hybrid B6-BALB/c background the onset of all traits was affected by sex, including tremors, limb-tone, grip-strength and startle-response (moderate tremor  $P=0.085$ ; limb-tone  $P=0.001$ ; grip-strength  $P=0.007$ ; startle response  $P=0.029$ ). Time to end point was significantly affected in B6-BALB/c ( $P=0.001$ ).

**Table S2. Mean averages and 95% confident intervals for survival time (weeks) for *SOD1<sup>G93Adl</sup>* on different genetic backgrounds, together with survival Log-rank pairwise comparisons (sex-averaged data).**

| Genetic background | Mean survival (weeks) | Std. error | 95% confidence interval |             | C57BL/6         | BALB/c          | C3H             | FVB             | B6-BALB/c       |
|--------------------|-----------------------|------------|-------------------------|-------------|-----------------|-----------------|-----------------|-----------------|-----------------|
|                    |                       |            | Lower bound             | Upper bound | Sig. (Log rank) |
| C57BL/6J           | 37.8                  | 0.5        | 36.800                  | 38.847      | -               | <.001           | <.001           | <.001           | 0.213           |
| BALB/c             | 31.3                  | 1.4        | 28.488                  | 34.082      | <.001           | -               | 0.870           | 0.896           | 0.008           |
| C3H                | 32.5                  | 1.1        | 30.398                  | 34.552      | <.001           | 0.870           | -               | 0.258           | 0.041           |
| FVB                | 29.1                  | 1.9        | 25.407                  | 32.878      | <.001           | 0.896           | 0.258           | -               | 0.005           |
| B6-BALB/c          | 35.6                  | 1.0        | 33.741                  | 37.461      | 0.213           | 0.008           | 0.041           | 0.005           | -               |
